# Supplementary material
Source: PubMed Central journal article supplement (PMC8362594)
Supplement: NEJMoa2105911_data-sharing.pdf [file NEJMoa2105911_data-sharing.pdf]

## Data Sharing Statement

The ATTACC, ACTIV-4a, and REMAP-CAP Investigators. Therapeutic Anticoagulation with Heparin in Noncritically Ill Patients with Covid-19. N Engl J Med. DOI: 10.1056/NEJMoa2105911.

| Question                                                            | Authors' Response                                                                                                          |
|---------------------------------------------------------------------|----------------------------------------------------------------------------------------------------------------------------|
| Will the data collected for your study be made available to others? | Yes                                                                                                                        |
| Would you like to offer context for your decision?                  | —                                                                                                                          |
| Which data?                                                         | Partial data sets                                                                                                          |
| Additional information about data                                   | The mpRCT is a federation of individually regulated platforms. We will post as complete a dataset of the trial as possible |
| How or where can the data be obtained?                              | At rzarychanski@cancercare.mb.ca                                                                                           |
| When will data availability begin?                                  | One year after publication of the trial                                                                                    |
| When will data availability end?                                    | Five years after publication of the trial                                                                                  |
| Will any supporting documents be available?                         | —                                                                                                                          |
| Which supporting documents?                                         | —                                                                                                                          |
| Additional information about supporting documents                   | —                                                                                                                          |
| How or where can supporting documents be obtained?                  | At rzarychanski@cancercare.mb.ca                                                                                           |
| When will supporting documents availability begin?                  | One year after publication of the trial                                                                                    |
| When will supporting documents availability end?                    | Five years after publication of the trial                                                                                  |
| To whom will data be available?                                     | Data will be available to researchers on request subject to sponsor restrictions                                           |
| For what type of analysis or purpose?                               | Research                                                                                                                   |
| By what mechanism?                                                  | After approval of a proposal, with investigator support                                                                    |
| Any other restrictions?                                             | —                                                                                                                          |
| Additional information                                              | —                                                                                                                          |

This statement was posted on August 4, 2021, at NEJM.org.
